# Supplementary material
Source: PubMed Central journal article supplement (PMC3719485)
Supplement: Supp_Fig1.pdf [file Supp_Fig1.pdf]

## Supplementary Data

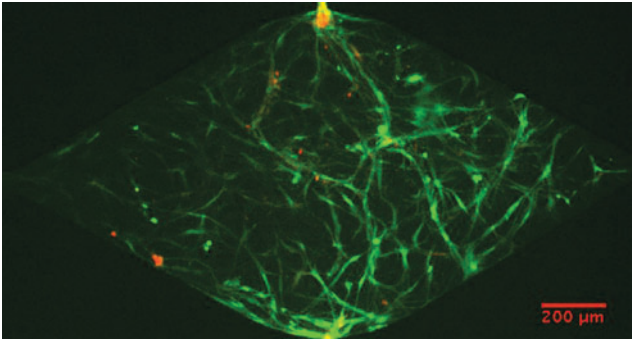

**SUPPLEMENTARY FIG. S1.** Live/Dead assay confirms that cell viability at 40 days exceeds 95%. Live cells fluoresce green, while dead cells fluoresce red.
